# Supplementary material for: Metabolomic Analysis of Wooden Breast Myopathy Shows a Disturbed Lipid Metabolism
Source: MDPI journal article supplement (doi:10.3390/metabo13010020), 2022-12-22
Supplement: s1 [file s1]

Supplemental Table S1. Significantly affected metabolites based on volcano plot between the groups (FDR-corrected  $P < 0.05$ , Log<sub>2</sub>FC threshold is 1).

|                                                                                                                                               | log <sub>2</sub> (FC) | P-value     |
|-----------------------------------------------------------------------------------------------------------------------------------------------|-----------------------|-------------|
| 3-Dehydroecdysone                                                                                                                             | -4.7808               | $P < 0.001$ |
| Homaline                                                                                                                                      | -3.822                | $P < 0.001$ |
| 20-Hydroxy-leukotriene B <sub>4</sub>                                                                                                         | -3.4207               | $P < 0.001$ |
| Leucyl-Alanine                                                                                                                                | -1.0919               | $P < 0.001$ |
| His-Met-Trp-Ser                                                                                                                               | -1.0455               | $P < 0.001$ |
| Phenylalanyl-Serine                                                                                                                           | -1.1125               | $P < 0.001$ |
| Alanyl-Tryptophan                                                                                                                             | -1.0207               | $P < 0.001$ |
| Hexanal octane-1,3-diol acetal                                                                                                                | -3.7221               | $P < 0.001$ |
| FA hydroxy.oxo.dimethyl20 prostadienoic acid                                                                                                  | -3.4568               | $P < 0.001$ |
| Seriny-Hydroxyproline                                                                                                                         | -1.0087               | $P < 0.001$ |
| Sucrose                                                                                                                                       | -3.1052               | $P < 0.001$ |
| .Glu-Ile-Pro-Thr                                                                                                                              | -3.469                | $P < 0.01$  |
| Hydroxymethylphosphonate                                                                                                                      | -1.3663               | $P < 0.01$  |
| Ethyl hexadecanoate                                                                                                                           | -3.3231               | $P < 0.01$  |
| Phosphocreatine                                                                                                                               | -2.9579               | $P < 0.01$  |
| Threoninyl-Glycine                                                                                                                            | -1.0555               | $P < 0.01$  |
| 2',3'-Dihydro-phytomenadione                                                                                                                  | -6.5216               | $P < 0.01$  |
| Methyl-delta-ionone                                                                                                                           | -4.2539               | $P < 0.01$  |
| Alpha-Tocotrienol                                                                                                                             | -6.181                | $P < 0.01$  |
| Berberubine                                                                                                                                   | -1.5769               | $P < 0.01$  |
| Vitamin K <sub>1</sub> 2,3-epoxide                                                                                                            | -7.835                | $P < 0.01$  |
| Fructose                                                                                                                                      | -1.8442               | $P < 0.01$  |
| Norselic acid C                                                                                                                               | -5.8677               | $P < 0.01$  |
| Sorbitan palmitate                                                                                                                            | -7.0678               | $P < 0.01$  |
| ST dimethyl60/60/60/30 5Z,7E,22E,24E,24bE-1S,3R-26,27-dimethyl-24a,24b,24c-trihomo-9,10-seco-5,7,10,19,22,24,24b-cholestahexaene-1,3,25-triol | -3.8808               | $P < 0.01$  |
| Asp-Leu-Pro-Ser                                                                                                                               | -4.2175               | $P < 0.01$  |
| Delta 8,14 -Sterol                                                                                                                            | -4.5842               | $P < 0.01$  |
| PI403                                                                                                                                         | -3.9259               | $P < 0.01$  |
| 1-O-Caffeoyl-b-D-glucose 6-O-sulfate                                                                                                          | -2.3037               | $P < 0.01$  |
| Quinic acid                                                                                                                                   | -2.2392               | $P < 0.01$  |
| 3-heptaprenyl-4-hydroxybenzoate                                                                                                               | -5.3764               | $P < 0.05$  |
| Ala-Lys-Thr-Arg                                                                                                                               | -2.4415               | $P < 0.05$  |
| 3-Hydroxy-2-methylpyridine-4,5-dicarboxylate                                                                                                  | -2.6633               | $P < 0.05$  |
| Lysyl-Glycine                                                                                                                                 | -1.4018               | $P < 0.05$  |
| Ergosterol                                                                                                                                    | -5.016                | $P < 0.05$  |
| 629.753811.1642                                                                                                                               | -5.1183               | $P < 0.05$  |
| Lys-Trp-Pro                                                                                                                                   | 1.7096                | $P < 0.05$  |
| Canrenone                                                                                                                                     | -2.4051               | $P < 0.05$  |
| N-Undecylbenzenesulfonic acid                                                                                                                 | -3.2378               | $P < 0.05$  |
| Theonellasterol B                                                                                                                             | -3.9968               | $P < 0.05$  |

|                                          |         |        |
|------------------------------------------|---------|--------|
| Guanosine triphosphate adenosine         | 3.4386  | P<0.05 |
| 3-Methylbutyl dodecanoate                | -3.7432 | P<0.05 |
| Ala-Asn-Pro-Pro                          | -4.1391 | P<0.05 |
| 3-Methylthiopropionic acid               | -2.1384 | P<0.05 |
| PI426                                    | -4.843  | P<0.05 |
| N-Acetylhistamine                        | 1.6269  | P<0.05 |
| Asp-Asp-Cys-Cys                          | -1.3811 | P<0.05 |
| Arginyl-Hydroxyproline                   | -1.1013 | P<0.05 |
| S-8-Gingerol                             | -2.6262 | P<0.05 |
| 17-Beta-Estradiol-3.17-beta-sulfate      | -1.0791 | P<0.05 |
| 1-Phospho-alpha-D-galacturonate          | 1.3592  | P<0.05 |
| 3-Methylbutyl decanoate                  | -3.3277 | P<0.05 |
| Berteroin                                | 1.0577  | P<0.05 |
| Cys-Lys-Gln-Pro                          | -2.422  | P<0.05 |
| Sinapinic acid-O-sulphate                | -1.5291 | P<0.05 |
| Homo-L-arginine                          | 1.2495  | P<0.05 |
| 2.3-bisAcetyloxypropyl icosanoate        | -4.6272 | P<0.05 |
| PR Coenzyme Q8                           | -4.6828 | P<0.05 |
| 3-octaprenyl-4-hydroxy-5-methoxybenzoate | -4.9768 | P<0.05 |
| 16-Hydroxy hexadecanoic acid             | -1.4103 | P<0.05 |
| Bisnorcholic acid                        | -1.7036 | P<0.05 |
| 2-Dodecylbenzenesulfonic acid            | -2.0799 | P<0.05 |
| PR 5-D-ribonylhopane                     | -3.5771 | P<0.05 |
| Sulforhodamine B                         | 2.7691  | P<0.05 |
| Cyclic AMP                               | -2.4736 | P<0.05 |
